# Supplementary material for: Sensory TRP channels contribute differentially to skin inflammation and persistent itch
Source: PubMed Central journal article supplement (PMC5661746; doi:10.1038/s41467-017-01056-8), 2017-10-30
Supplement: 41467_2017_1056_MOESM1_ESM.pdf [file 41467_2017_1056_MOESM1_ESM.pdf]

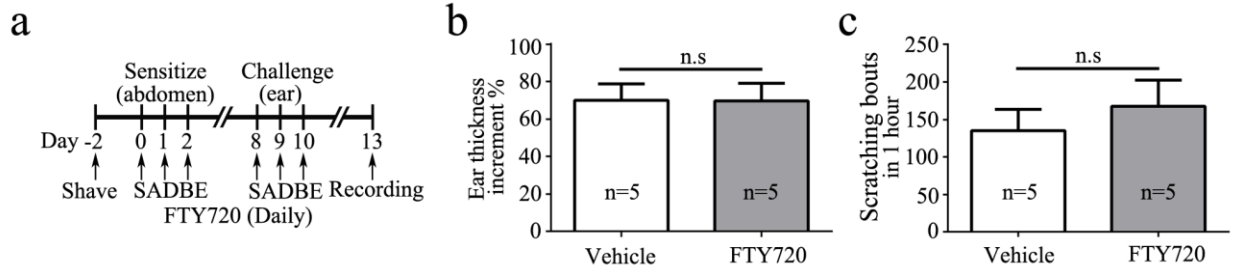

**Supplementary Figure 1. Pharmacological inhibition of T cell egression with FTY720 affects neither skin inflammation nor spontaneous scratching.** (a) Schematic protocol of FTY720 treatment in the induction of SADBE-induced CHS. (b-c) Ear thickness increment (b) and spontaneous scratching (c) in *wt* mice when compared with vehicle-treated animals. Data are presented as mean  $\pm$  SEM. n.s, not significant, Student's *t*-test.

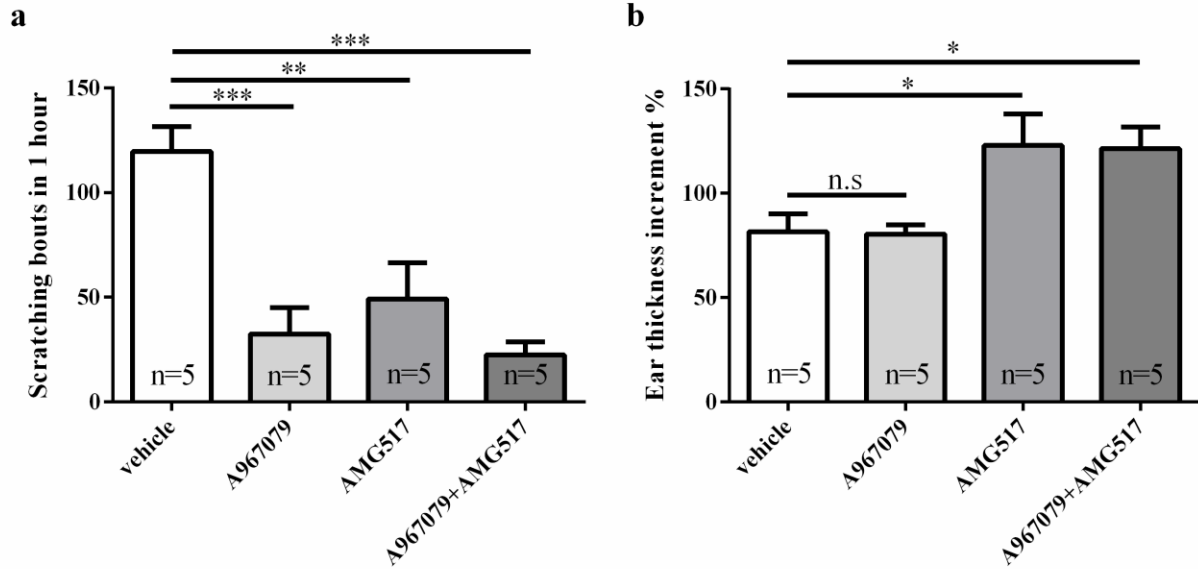

**Supplementary Figure 2. Differential effects of pharmacological inhibition of TRPA1 and/or TRPV1 on SADBE-induced skin inflammation and spontaneous scratching. (a-b)** SADBE-elicited spontaneous scratching (**a**) and skin inflammation (**b**) in *wt* mice treated with selective TRPA1 and/or TRPV1 antagonists. Mice were given 200  $\mu$ l of 10 mg/kg A967079 (a potent and selective TRPA1 antagonist) and/or 30 mg/kg AMG517 (a potent and selective TRPV1 antagonist) by oral gavage daily starting 3 days before the first SADBE challenge. Itch behavior and ear edema were measured 3 days after the last SADBE challenge. Data are presented as mean  $\pm$  SEM. n.s, not significant, \*  $p < 0.05$ , \*\*  $p < 0.01$ , \*\*\*  $p < 0.001$ , ANOVA.

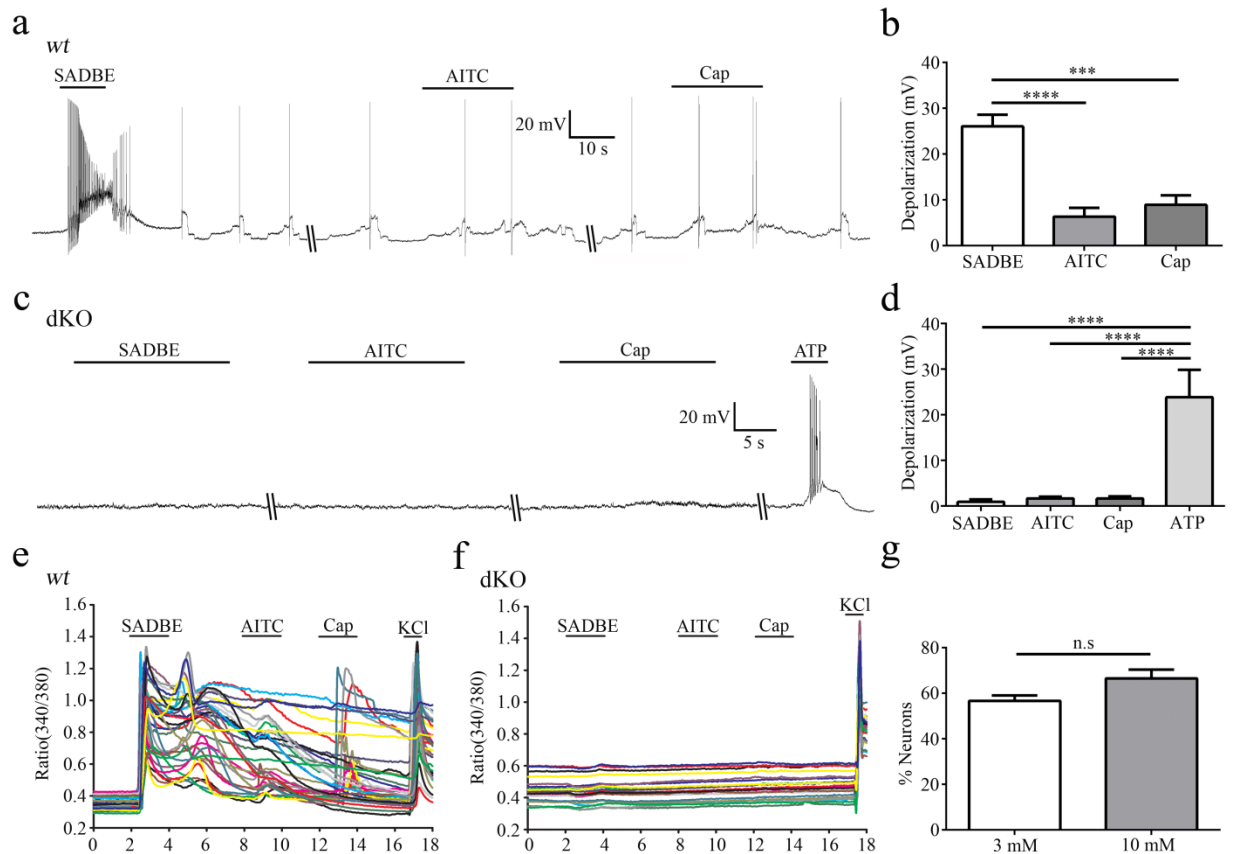

**Supplementary Figure 3. SADBE at 10 mM does not activate DRG neurons isolated from the *Trpa1*<sup>-/-</sup>/*Trpv1*<sup>-/-</sup> dKO mice.** (a) SADBE-induced depolarization of membrane potential and action potential firing in DRG neurons isolated from *wt* mice; (b) Quantification of membrane depolarization induced by SADBE, AITC and Cap. Data are presented as mean ± SEM. n=5, \*\*\*  $p < 0.001$ , \*\*\*\*  $p < 0.0001$ , ANOVA; please note that AITC- and Cap-activated responses were markedly reduced when applied after SADBE. (c) SADBE did not induce depolarization of membrane potential and action potential firing in DRG neurons isolated from the *Trpa1*<sup>-/-</sup>/*Trpv1*<sup>-/-</sup> dKO mice; ATP was used as a positive control; (d) Quantification of depolarization of membrane potentials induced by SADBE, AITC, Cap and ATP. Data are presented as mean ± SEM. n=5, \*\*\*\*  $p < 0.0001$ , ANOVA; (e-f) SADBE-induced calcium influx in *wt* (n=5 coverslips, 689 neurons) and *Trpa1*<sup>-/-</sup>/*Trpv1*<sup>-/-</sup> dKO (n=5 coverslips, 752 neurons) DRG neurons; (g) Percentages of *wt* DRG neurons responded to 3 mM and 10 mM SADBE. Data are presented as mean ± SEM. n.s, not significant. Student's *t*-test.

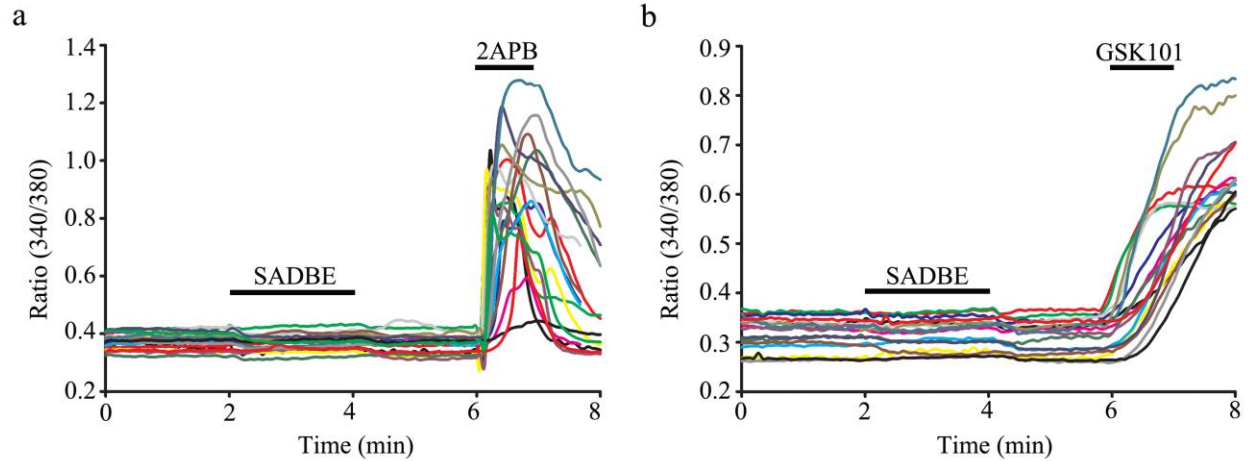

**Supplementary Figure 4. SADBE does not activate HEK293 cells transfected with mouse TRPV3 or rat TRPV4 construct.** (a) 3 mM SADBE did not induce calcium influx in HEK293 cells transfected with mouse TRPV3; the TRPV4 activator 300  $\mu$ M 2-Aminoethoxydiphenylborane (2APB) was used as a positive control; (b) 3 mM SADBE did not induce calcium influx in HEK293 cells transfected with rat TRPV4; the TRPV4 activator GSK1016790A (GSK101, 0.3  $\mu$ M) was used as a positive control.

a TRPA1-3C expressing HEK293 cells

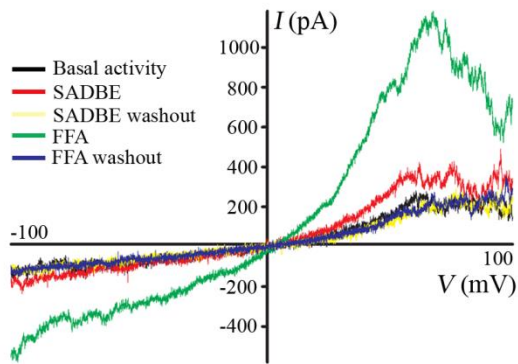

b

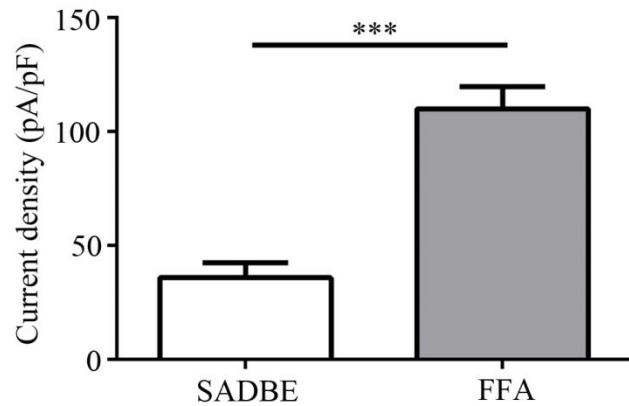

**Supplementary Figure 5. SADBE-activated whole-cell membrane currents are severely attenuated in TRPA1 cysteine mutants expressed in HEK293 cells.** (a) Representative I-V curves of TRPA1-3C currents in response to 3 mM SADBE and 100  $\mu$ M FFA; (b) Quantification of SADBE- and FFA-induced TRPA1-3C currents measured at +60 mV. FFA is a non-electrophilic TRPA1 activator. Data are presented as mean  $\pm$  SEM. n=6. \*\*\*  $p$ <0.001, Student's  $t$ -test.

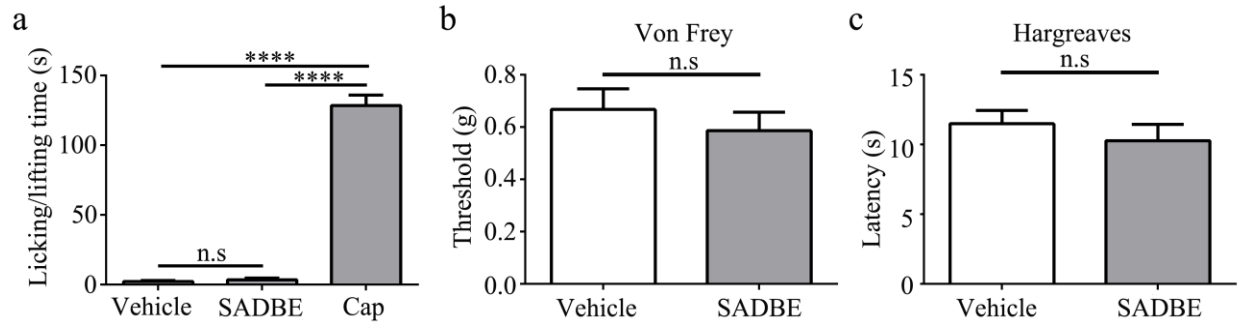

**Supplementary Figure 6. Intraplantar injections of SADBE does not elicit a pain-like behaviors in mice.** (a) Paw licking/lifting nocifensive response after intradermal injection of vehicle, SADBE (30mM) or capsaicin (Cap, 0.5  $\mu$ g) into a hindpaw of *wt* mice. Data are presented as mean  $\pm$  SEM.  $n=5$  per group. Asterisks indicate statistical significance. \*\*\*\*  $p<0.0001$ , ANOVA. n.s, not significant. (b-c) Paw withdrawal threshold in response to mechanical stimuli (b) and thermal stimuli (c) after intraplantar injections of 10  $\mu$ l vehicle or 30 mM SADBE in *wt* mice. Data are presented as mean  $\pm$  SEM.  $n=5$  per group. n.s, not significant, Student's *t*-test;

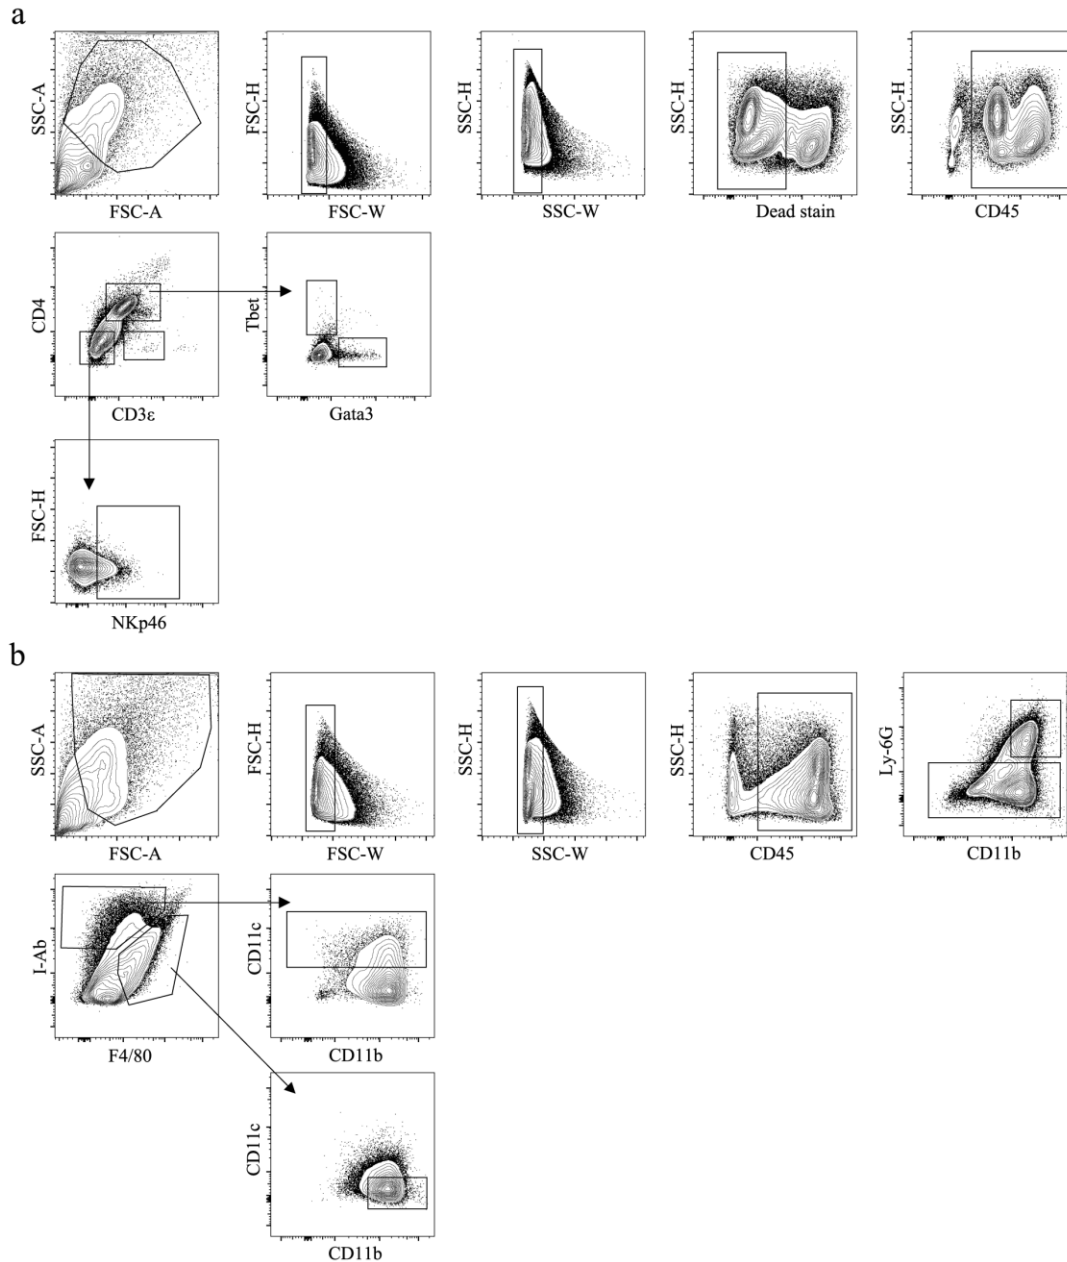

**Supplementary Figure 7. Gating strategy for flow cytometry using single-cell suspensions from mouse ear skin preparations.** (a) Cells were gated on size and granularity, doublet events and dead cells removed, and then CD45<sup>+</sup> cells were selected. CD11b<sup>+</sup> Ly-6G<sup>+</sup> cells were used to define neutrophils. Ly-6G<sup>-</sup> cells were further divided into F4/80<sup>hi</sup> I-Ab<sup>low</sup> macrophages and F4/80<sup>low/-</sup> I-A<sup>b-hi</sup> cells dendritic cells. Macrophages and dendritic cells were further classified as CD11c<sup>-</sup> and CD11c<sup>+</sup>, respectively; (b) Helper T cells were defined as CD3ε<sup>+</sup> CD4<sup>+</sup> lymphocytes expressing either Gata3 (Th2) or Tbet (Th1) transcription factors by intracellular staining. NK cells were defined as CD3ε<sup>-</sup> CD4<sup>-</sup> lymphocytes that were NKp46<sup>+</sup>.

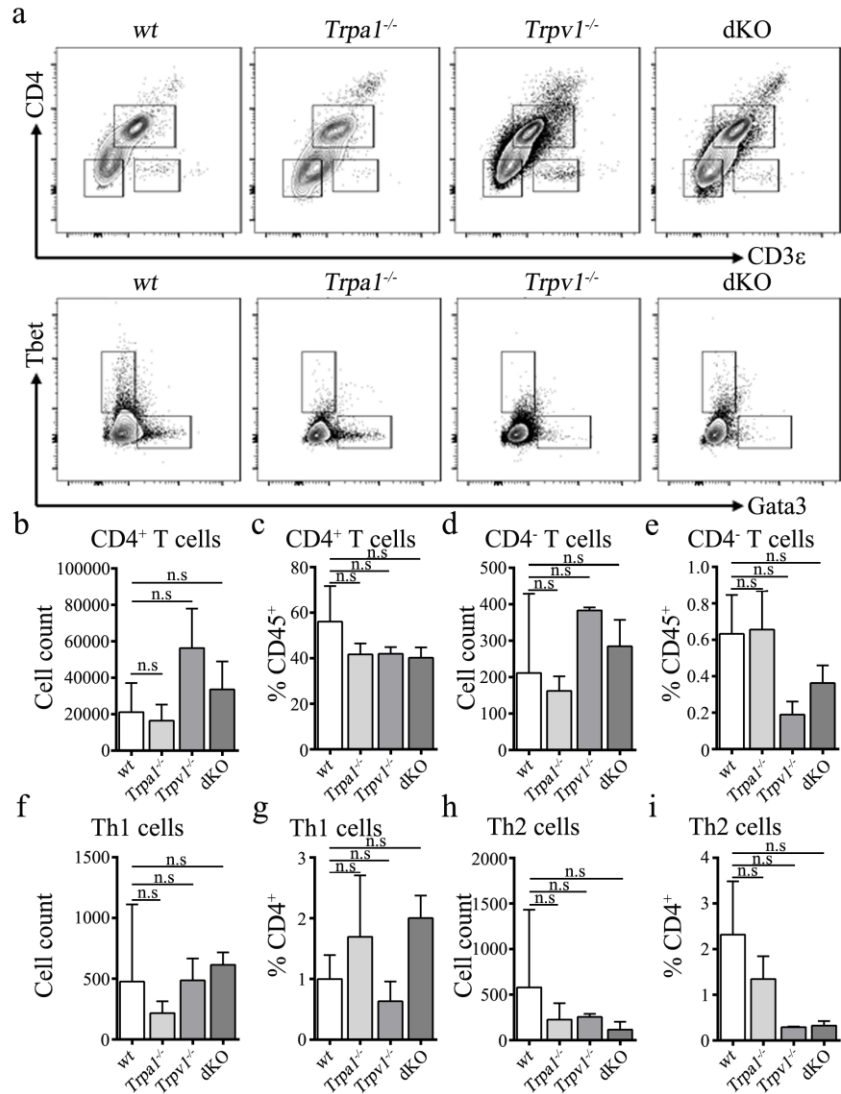

**Supplementary Figure 8. Quantification of T cell populations in SADBE-treated ear preparations from *wt*, *Trpa1*<sup>-/-</sup>, *Trpv1*<sup>-/-</sup> and *Trpa1*<sup>-/-</sup>/*Trpv1*<sup>-/-</sup> dKO mice.** (a) Gating strategy for the identification of Th1 and Th2 cells. Th1 cells were defined as CD3ε<sup>+</sup> CD4<sup>+</sup> Tbet<sup>+</sup>, Th2 cells were defined as CD3ε<sup>+</sup> CD4<sup>+</sup> Gata3<sup>+</sup>; (b, d, f, h) Comparison of cell numbers of CD4<sup>+</sup> T cells (b), CD4<sup>-</sup> T cells (d), Th1 cells (f) and Th2 cells (h) sorted from the single-cell suspensions from mouse ear skin preparations of *wt*, *Trpa1*<sup>-/-</sup>, *Trpv1*<sup>-/-</sup> and *Trpa1*<sup>-/-</sup>/*Trpv1*<sup>-/-</sup> dKO mice; (c, e) Comparison of the percentage of CD4<sup>+</sup> T cells (c) and CD4<sup>-</sup> T cells (e) in the CD45<sup>+</sup> population from the ear preparations of *wt*, *Trpa1*<sup>-/-</sup>, *Trpv1*<sup>-/-</sup> and *Trpa1*<sup>-/-</sup>/*Trpv1*<sup>-/-</sup> dKO mice; (g, i) Comparison of the percentages of Th1 cells (g) and Th2 cells (i) in the CD4<sup>+</sup> population from the ear preparations of *wt*, *Trpa1*<sup>-/-</sup>, *Trpv1*<sup>-/-</sup> and *Trpa1*<sup>-/-</sup>/*Trpv1*<sup>-/-</sup> dKO mice. All data are presented as mean ± SEM. n=3 for each group. n.s., not significant, ANOVA.



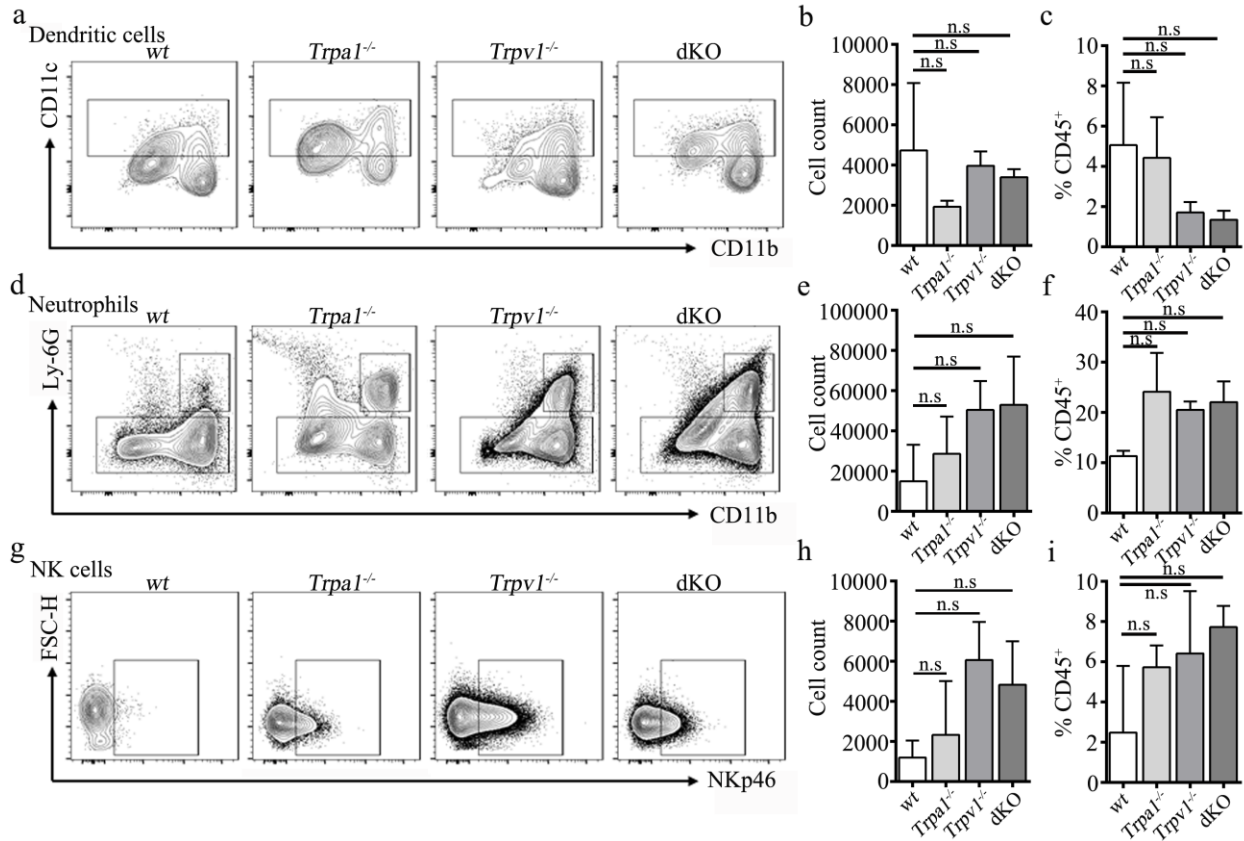

**Supplementary Figure 9. Quantification of different types of myeloid cells in single-cell suspensions from SADBE-treated ear skin preparations of *wt*, *Trpa1*<sup>-/-</sup>, *Trpv1*<sup>-/-</sup> and *Trpa1*<sup>-/-</sup>/*Trpv1*<sup>-/-</sup> dKO mice.** (a, d, g) Representative FACS plots of dendritic cells (a), neutrophils (d) and NK cells (g). Dendritic cells were defined as I-A<sup>b-hi</sup> F4/80<sup>+/+</sup> CD11b<sup>+/+</sup> CD11c<sup>+</sup>, neutrophils were defined as CD11b<sup>+</sup> Ly6-G<sup>+</sup> I-A<sup>b</sup> F4/80<sup>-</sup>, NK cells were defined as CD3ε<sup>-</sup> CD4<sup>-</sup> NKp46<sup>+</sup>; (b, e, h) Comparison of cell number of dendritic cells (b), neutrophils (e) and NK cells (h) sorted from the ear preparations of *wt*, *Trpa1*<sup>-/-</sup>, *Trpv1*<sup>-/-</sup> and *Trpa1*<sup>-/-</sup>/*Trpv1*<sup>-/-</sup> dKO mice. All data are presented as mean ± SEM. n=3 for each group, n.s, not significant, ANOVA; (c, f, i) Comparison of the percentage of dendritic cells (c), neutrophils (f) and NK cells (i) in the CD45<sup>+</sup> population from the inflamed ear preparations of *wt*, *Trpa1*<sup>-/-</sup>, *Trpv1*<sup>-/-</sup> and *Trpa1*<sup>-/-</sup>/*Trpv1*<sup>-/-</sup> dKO mice. All data are presented as mean ± SEM. n=3 for each group. n.s, not significant, ANOVA.

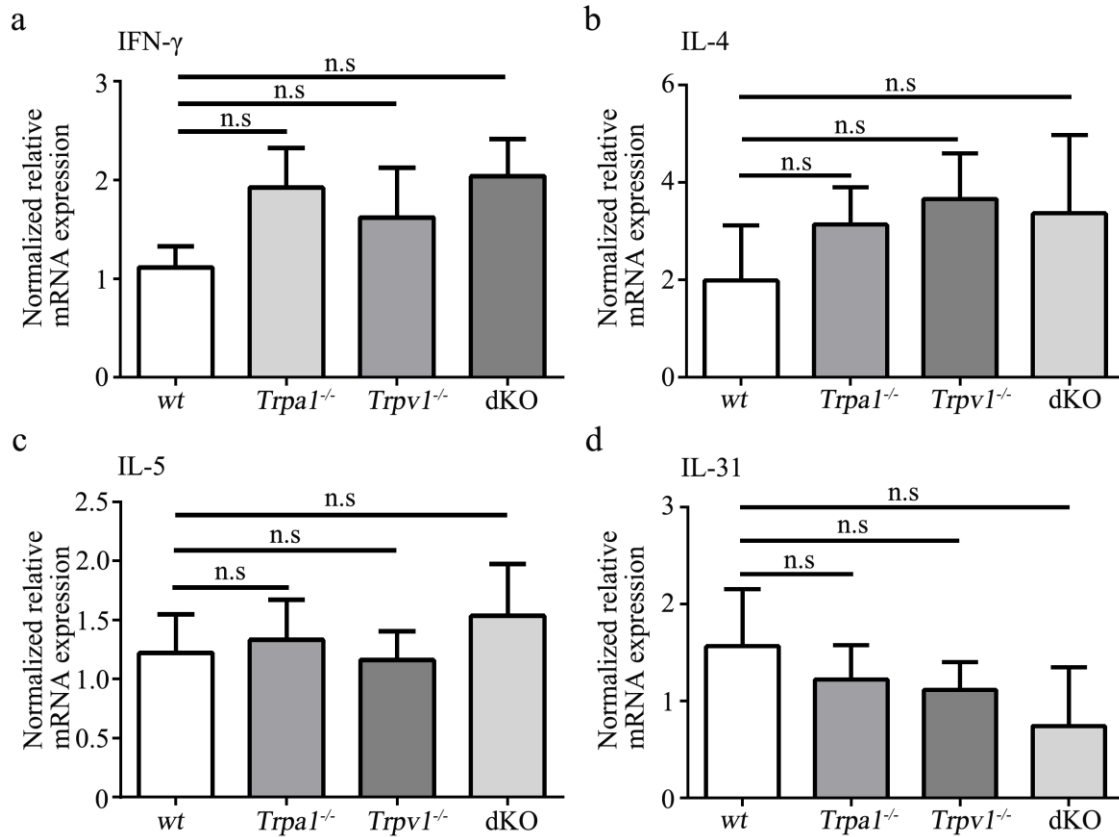

**Supplementary Figure 10. Expression levels of Th1 and Th2 cytokines following SADBE treatments are not affected by genetic ablation of TRPA1 and/or TRPV1.** (a-d) Expression of proinflammatory cytokines IFN- $\gamma$  (a), IL-4 (b), IL-5 (c), and IL-31 (d) in the SADBE-treated ear preparations of *wt*, *Trpa1*<sup>-/-</sup>, *Trpv1*<sup>-/-</sup> and *Trpa1*<sup>-/-</sup>/*Trpv1*<sup>-/-</sup> dKO mice. All data are presented as mean  $\pm$  SEM. n=3 for each group. n.s, not significant, ANOVA.

## Supplementary Table 1

EC<sub>50</sub> values of SADBE-activated responses in wild-type and TRPA1 mutants.

|                | EC <sub>50</sub> (mM) | n |
|----------------|-----------------------|---|
| TRPA1          | 1.30±0.02             | 5 |
| TRPA1-K710A    | 6.03±0.01*            | 5 |
| TRPA1-3C       | N.D                   | 5 |
| TRPA1-3C+K710A | N.D                   | 5 |

N.D, not determined; \*  $p < 0.05$ , *versus wt*, Student's *t*-test.

## Supplementary Table 2

EC<sub>50</sub> values of SADBE-activated responses in wild-type and TRPV1 mutants.

|             | EC <sub>50</sub> (mM)     | n |
|-------------|---------------------------|---|
| TRPV1       | 7.26±0.01                 | 5 |
| TRPV1-R115A | 13.79±0.03 <sup>n.s</sup> | 5 |
| TRPV1-Y512A | N.D                       | 5 |
| TRPV1-S513A | N.D                       | 5 |
| TRPV1-M548L | 2.41±0.01 <sup>**</sup>   | 5 |
| TRPV1-T551A | N.D                       | 5 |

N.D, not determined; n.s, not significant; \*\*  $p < 0.01$ , *versus wt*, Student's *t*-test.
